# Supplementary material for: Pupil-linked phasic arousal evoked by violation but not emergence of regularity within rapid sound sequences
Source: PubMed Central journal article supplement (PMC6731273; doi:10.1038/s41467-019-12048-1), 2019-09-06
Supplement: 41467_2019_12048_MOESM4_ESM.pdf [file 41467_2019_12048_MOESM4_ESM.pdf]

## **Description of Additional Supplementary Files**

File Name: Supplementary Audio 1

Description: Example of a RAND20 stimulus (wav file)

File Name: Supplementary Audio 2

Description: Example of a RAND20-REG10 stimulus (wav file)

File Name: Supplementary Audio 3

Description: Example of a REG10 stimulus (wav file)

File Name: Supplementary Audio 4

Description: Example of a REG10-RAND20 stimulus (wav file)
